# Supplementary material for: Comparative transcriptome analysis of purple-fleshed sweet potato and its yellow-fleshed mutant provides insight into the transcription factors involved in anthocyanin biosynthesis in tuberous root
Source: Front Plant Sci. 2022 Aug 8;13:924379. doi: 10.3389/fpls.2022.924379 (PMC9393619; doi:10.3389/fpls.2022.924379)
Supplement: Supplementary Table 1 — Primers used in this manuscript. [file Table_1.XLSX]

## Sheet: Genotyping of MYB1
Gene name	Primer name	Primer sequences (5'-3')
IbMYB1-1	Pro_MF_A F	GTGGAAAACATGTGCAGTGTCATC
	Pro_MF_A R	GGACCATGAACCTTTTCTCACTCT
IbMYB1-2	Pro_MF_M F	ACCTGAACCGGCCCTTATTATG
	Pro_MF_M R	GGACCATGAACCTTTTCTCACTCT

## Sheet: Genomic PCR in Zhezi1 and Xinli
Gene name	Primer name	Primer sequences (5'-3')
IbCHS	CHS-F	GGACTACCAGCTCACCAAGC
	CHS-R	GTCCTCCACTTGGTCCAGAA
IbF3H	F3H-F	CGAGATTCCGGTGATATCGT
	F3H-R	GGGGCATTTTGGGTAGAAAT
IbDFR	DFR-F	TCCTGGGAACACAAAGAAGG
	DFR-R	GAGCTTCGCAGAGATCATCC
IbANS	ANS-F	ATTTTCGCGGAGGAAAAGAT
	ANS-R	CTTCCTTCTCCAGCCTTCCT
Ib3GT	3GT-F	AAGTATCGATCGGCGAAATG
	3GT-F	CACGATATGGCCTCCAGAGT
IbACTIN	ACT-F	GACTACCATGTTCCCCGGTA
	ACT-F	TTGTATGCCACGAGCATCTT

## Sheet: qRT-PCR in sweet potato
Gene names	Primer names	primer sequences (5'-3')
IbbHLH2	DL-IbbHLH2-F	GTGGGCAGTGGTCGGAGTT
	DL-IbbHLH2-R	AGAAGGGCGTATTTGAGG
IbbHLH1	DL-IbbHLH1-F	TAGCGAAGAACCAAACCG
	DL-IbbHLH1-R	GGAACTCCAGGAACAATA
IbWRKY21	DL-IbWRKY21-F	GTGTTTGCTGACTGT
	DL-IbWRKY21-R	TCTTCGTTTTCCTAT
IbWRKY24	DL-IbWRKY24-F	GGATCGCAAATCTCAGCCGTCAG
	DL-IbWRKY24-R	CTTCGTCGGAGATGATGAGCCAAG
IbWRKY44	DL-IbWRKY44-F	GACCTCCTCCACCGTGCTATCC
	DL-IbWRKY44-R	CTCATCGCCTTCTGCCTCCAATC
IbCHS	DL-IbCHS-F	GTCAACCAAAGCACCTACCC
	DL-IbCHS-R	CTCCACCACCGCAATGTC
IbCHI	DL-IbCHI-F	TGTCGCCGAAGTCAAAGT
	DL-IbCHI-R	TCTCAAAGGGACCCGTAA
IbF3H	DL-IbF3H-F	TCGTTTCCAGCCATCTCC
	DL-IbF3H-R	TCCGTTACTGCCCTCCACC
IbUFGT	DL-IbUFGT-F	TTCGTAGTTTAGTCGCCGCC
	DL-IbUFGT-R	CCGATCGATACTTCTGACATTCC
Ib4CL	DL-Ib4CL-F	CAAAGAACTCATCAAATTCAAAGG
	DL-Ib4CL-R	AACCACAAACGCAACAGG
IbMYB1	DL-IbMYB1-F	TGACGACACAACCGGAAAC
	DL-IbMYB1-R	ACATCTTCCCACCACTTCACA
IbMYB27	DL-IbMYB27-F	GGGAAGAGCCGTGTTACT
	DL-IbMYB27-R	GCATCTGAAACTTCACCGTC
IbANS	DL-IbANS-F	CTCTCCATTTGGCCTAAAACTCC
	DL-IbANS-R	TCTCCAGCCTTCCTTCCTCTAAC
IbDFR	DL-IbDFR-F	GCTCTTCTCATCATACAACCATCC
	DL-IbDFR-R	AGGCAAGTCCTTTTCAATACCC
IbETC1	DL-IbETC1-F	TGTGGTACTGAAGCTCAAGTGG
	DL-IbETC1-R	CGACCACCTTTCTCCAACCA
IbPAL	DL-IbPAL-F	GTAGAACCAAACAAGGTGGCG
	DL-IbPAL-R	GTTGCTGAATGGGGAAGAGTG
GAPDH	DL-GADPH-F	GTCTTTGGATGCAGGAACCC
	DL-GADPH-R	AGCGGCAGCCTTGTCCTTG

## Sheet: qRT-PCR in tobacco
Gene names	Primer names	primer sequences (5'-3')
NtCHS	NtCHS-F	TTGTTCGAGCTTGTCTCTGC
	NtCHS-R	AGCCCAGGAACATCTTTGAG
NtCHI	NtCHI-F	GTCAGGCCATTGAAAAGCTC
	NtCHI-R	CTAATCGTCAATGCCCCAAC
NtF3H	NtF3H-F	CAAGGCATGTGTGGATATGG
	NtF3H-R	TGTGTCGTTTCAGTCCAAGG
NtDFR	NtDFR-F	AACCAACAGTCAGGGGAATG
	NtDFR-R	TTGGACATCGACAGTTCCAG
NtANS	NtANS-F	TGGCGTTGAAGCTCATACTG
	NtANS-R	GGAATTAGGCACACACTTTGC
NtUFGT	NtUFGT-F	GAGTGCATTGGATGCCTTTT
	NtUFGT-F	CCAGCTCCATTAGGTCCTTG
NtF3'H	NtF3'H-F	AGGCTCAACACTTCTCGT
	NtF3'H-R	CATCAACTTTGGGCTTCT
NtbHLH1	NtbHLH1-F	ACCATTCTCGAACACCGAAG
	NtbHLH1-R	TGCTAGGGCACAATGTGAAG
NtbHLH2	NtbHLH2-F	CTTGAACACTTCTCAAACCGA
	NtbHLH2-R	TGCTAGGGCACAATGTGAAG
NtACTIN	NtACTIN-F	AATGGGACTGGAATGGTCAAGGT
	NtACTIN-R	TGCCAGATTTTCTCCATATCATCCCA

## Sheet: RT-qPCR in Arabidopsis
Gene names	Primer names	primer sequences (5'-3')
AtACTIN	Atactin-F	GCCCCTGAGGAGCACCCAGTT
	Atactin-R	CCGGTTGTACGACCACTGGCA
AtCHS	AtCHS-F	TGACTGGAACTCCCTCTTCT
	AtCHS-R	GCCCTCATCTTCTCTTCCTTTAG
AtF3H	AtF3H-F	AGGAGGATTCATCGTCTCTAGT
	AtF3H-R	CACCGTGAGTAGTCTCTGTTTC
AtDFR	AtDFR-F	CGTTCGAGATCCCGGTAATTT
	AtDFR-R	TCGTAGCTTCCTTCCTCAGATA
AtANS	AtANS-F	GGCCTAAGACACCAAGTGATTA
	AtANS-R	AAACCTAGACCGACAGAGAGA
AtTT2	AtTT2-F	ATGGGAAAGAGAGCAACTAC
	AtTT2-R	CACAAGTGAAGTCTCGGAGCC
AtTT8	AtTT8-F	ATGGATGAATCAAGTATTATTC
	AtTT8-R	CTAGATTAGTATCATGTATTATG
AtTTG1	AtTTG1-F	AACTCTCTTATGAACCGCACC
	AtTTG1-R	AGTGAGAGGAGAGTTTTGAGGT
AtANR	AtANR-F	ACATTTGCTGTGCTTACAACACAAGT
	AtANR-R	GAAAGCCTTCATTGATAAGTTTTTGCG

## Sheet: Clone primer of TFs
Gene names	Primer names	primer sequences (5'-3')
IbMYB1	MYB1-F	CTGACGACACAACCGGAAAC
	MYB1-R	CACATCTTCCCACCACTTCACA
IbMYB27	MYB27-F	CGGGAAGAGCCGTGTTACT
	MYB27-R	CGCATCTGAAACTTCACCGTC
IbETC1	ETC1-F	ATGGCTGACTTGGATACCAAT
	ETC1-R	TCATTGGCTGGTGGAGTATCT
IbbHLH1	IbbHLH1-F	GTGTGTGTTGGATATGCTCTG
	IbbHLH1-R	GTGTGGAAATGCAAGCAAAGG
IbbHLH2	IbbHLH2-F	CGCCGCTTTAATTAGCTTCTCTG
	IbbHLH2-R	CTAGACTACTAGTGGCTACCTTG
IbWD40	IbWD40-F	GGAAAGATCGTATTTTGAGCCC
	IbWD40-R	CTGATAGTTCTGTTCCTGCTGC
IbWRKY44	IbWRKY44-F	ATGGAGATCAAAGAGGTAAAGAAGATT
	IbWRKY44-R	CTATGATTTTTCCTTTGTGGCTGC
ProIbWRKY44	PIbWRKY44-F	GCCAGGTTGTCATCATTATTGC
	PIbWRKY44-R	CGCAACAGGTTTGGCTAC
ProIbDFR	PIbDFR-F	ATTAAGCGTTGAAGTGTGGTTAT
	PIbDFR-R	TATATTTTTGCTCAGATCAATAAGCGA
ProIbMYBx-ZZ	PIbMYBx-ZZ-F	CGTATCATATTCCTGAATATGCAATTTT
	PIbMYBx-ZZ-R	GTACCACAAGTACTTGAATTGGTAT
ProIbMYB27	PIbMYB27-F	GTGGATTGTCACTTATAAATCTATGACAA
	PIbMYB27-R	GCCGTGTTTTCGGATGTAATCTA
