# Supplementary material for: Comparative transcriptome analysis of purple-fleshed sweet potato and its yellow-fleshed mutant provides insight into the transcription factors involved in anthocyanin biosynthesis in tuberous root
Source: Front Plant Sci. 2022 Aug 8;13:924379. doi: 10.3389/fpls.2022.924379 (PMC9393619; doi:10.3389/fpls.2022.924379)
Supplement: Supplementary Table 2 — Summary of RNA-seq data. [file Table_2.XLSX]

## Sheet: Sheet1
Term	ZZP	XLY
Number of raw reads	49865948	50332429
Total nucleotides (bp)	7.37G	7.29G
Number of clean reads	48582091	49157082
GC content (%)	47.4367	47.7433
Q30 percentage (%)	91.09	91.1667
The percentages indicate that different types of data account for the total number of transcripts or unigenes.
